# Supplementary material
Source: MDPI journal article supplement (https://www.mdpi.com/2411-5150/7/3/49)
Supplement: s1 [file s1]

# Supplementary Materials: Impact of the COVID-19 Pandemic on Mental Health among Patients with Chronic Ocular Conditions

Soumaya Bouhout, Mélanie Hébert, Weronika Jakubowska, Laurence Jaworski, Ellen E. Freeman and Marie-Josée Aubin

**Table S1.** Baseline characteristics of the cohort by principal disease category.

| Characteristic                                    | Glaucoma, n=31    | AMD, n=34         | PDR, n=37         | Chronic uveitis, n=43 | p-value |
|---------------------------------------------------|-------------------|-------------------|-------------------|-----------------------|---------|
| Age                                               | 73 [64, 76]       | 77 [73, 84]       | 66 [58, 72]       | 59 [45, 67]           | <0.001  |
| Female sex                                        | 18, 58%           | 22, 65%           | 9, 24%            | 26, 35%               | <0.001  |
| Ethnicity                                         |                   |                   |                   |                       |         |
| Caucasian                                         | 18, 58%           | 25, 74%           | 21, 57%           | 24, 56%               | 0.38    |
| Asian                                             | 1, 3%             | 0, 0%             | 2, 5%             | 3, 7%                 | 0.47    |
| Black                                             | 0, 0%             | 0, 0%             | 2, 5%             | 0, 0%                 | 0.12    |
| Afro-caribbean                                    | 1, 3%             | 0, 0%             | 0, 0%             | 0, 0%                 | 0.30    |
| Native Indian                                     | 0, 0%             | 0, 0%             | 0, 0%             | 0, 0%                 | NA      |
| Hispanic                                          | 1, 3%             | 1, 3%             | 0, 0%             | 1, 2%                 | 0.77    |
| Unknown                                           | 9, 29%            | 8, 24%            | 11, 30%           | 14, 33%               | 0.86    |
| Other                                             | 1, 3%             | 0, 0%             | 1, 3%             | 2, 5%                 | 0.67    |
| Visual acuity (VA), logMAR                        |                   |                   |                   |                       |         |
| Right eye                                         | 0.14 [0.00, 0.33] | 0.30 [0.18, 0.88] | 0.30 [0.10, 0.35] | 0.10 [0.00, 0.30]     | <0.001  |
| Left eye                                          | 0.10 [0.00, 0.25] | 0.42 [0.17, 1.55] | 0.30 [0.10, 0.57] | 0.10 [0.00, 0.33]     | <0.001  |
| Best VA eye                                       | 0.00 [0.00, 0.14] | 0.18 [0.10, 0.31] | 0.10 [0.04, 0.30] | 0.01 [0.00, 0.18]     | <0.001  |
| Worst VA eye                                      | 0.18 [0.10, 0.60] | 0.79 [0.32, 2.30] | 0.40 [0.24, 0.85] | 0.25 [0.00, 0.55]     | <0.001  |
| Intraocular pressure, mmHg                        |                   |                   |                   |                       |         |
| Right eye                                         | 16 [13, 18]       | 15 [10, 20]       | 16 [12, 17]       | 16 [15, 19]           | 0.64    |
| Left eye                                          | 14 [10, 17]       | 15 [12, 18]       | 15 [12, 18]       | 16 [15, 20]           | 0.15    |
| Systemic medical conditions                       |                   |                   |                   |                       |         |
| No medical condition                              | 5, 16%            | 4, 12%            | 0, 0%             | 5, 12%                | 0.12    |
| Interstitial lung disease                         | 0, 0%             | 1, 3%             | 0, 0%             | 0, 0%                 | 0.35    |
| Chronic obstructive pulmonary disease or asthma   | 2, 7%             | 3, 9%             | 2, 5%             | 3, 7%                 | 0.95    |
| Diabetes                                          | 6, 19%            | 5, 15%            | 37, 100%          | 4, 9%                 | <0.001  |
| Morbid obesity, <i>body mass index</i> >40        | 0, 0%             | 0, 0%             | 2, 5%             | 0, 0%                 | 0.12    |
| Hypertension                                      | 11, 36%           | 15, 44%           | 26, 70%           | 11, 26%               | <0.001  |
| Dyslipidemia                                      | 7, 23%            | 14, 41%           | 20, 54%           | 8, 19%                | 0.003   |
| Cardiovascular disease (CAD, CHF)                 | 2, 7%             | 7, 21%            | 4, 11%            | 2, 5%                 | 0.12    |
| Pulmonary hypertension                            | 0, 0%             | 0, 0%             | 0, 0%             | 0, 0%                 | NA      |
| Chronic kidney disease or end-stage renal disease | 1, 3%             | 1, 3%             | 5, 14%            | 0, 0%                 | 0.03    |
| Cancer                                            | 2, 7%             | 5, 15%            | 2, 5%             | 0, 0%                 | 0.07    |
| Organ transplant recipient                        | 0, 0%             | 0, 0%             | 0, 0%             | 0, 0%                 | NA      |
| Immunodeficiency                                  | 0, 0%             | 0, 0%             | 0, 0%             | 0, 0%                 | NA      |
| Inflammatory bowel disease                        | 1, 3%             | 0, 0%             | 0, 0%             | 5, 12%                | 0.03    |
| Liver disease                                     | 0, 0%             | 2, 6%             | 0, 0%             | 1, 2%                 | 0.27    |
| Chronic neurological or neuromuscular disease     | 1, 3%             | 1, 3%             | 0, 0%             | 3, 7%                 | 0.40    |
| Trisomy 21                                        | 0, 0%             | 0, 0%             | 0, 0%             | 0, 0%                 | NA      |
| Psychiatric condition (e.g., schizophrenia, BP)   | 2, 7%             | 0, 0%             | 2, 5%             | 2, 5%                 | 0.56    |
| Rheumatologic disease                             | 2, 7%             | 2, 6%             | 1, 3%             | 7, 16%                | 0.14    |
| Unknown                                           | 5, 16%            | 1, 3%             | 0, 0%             | 14, 33%               | <0.001  |
| Other                                             | 0, 0%             | 4, 12%            | 7, 19%            | 3, 7%                 | 0.06    |

BP = bipolar disorder; CAD = coronary artery disease; CHF = congestive heart failure.

**Table S2.** National Eye Institute Visual Function Questionnaire-25 subscale answers by principal disease category.

| <b>Characteristic</b> | <b>Glaucoma, n=31</b> | <b>AMD, n=34</b> | <b>PDR, n=37</b> | <b>Chronic uveitis, n=43</b> | <b>p-value</b> |
|-----------------------|-----------------------|------------------|------------------|------------------------------|----------------|
| General Health        | 53 [48, 75]           | 58 [50, 65]      | 60 [43, 71]      | 60 [50, 75]                  | 0.62           |
| General Vision        | 60 [55, 78]           | 65 [49, 76]      | 70 [55, 80]      | 75 [50, 80]                  | 0.26           |
| Ocular Pain           | 88 [75, 100]          | 100 [72, 100]    | 88 [75, 100]     | 88 [75, 100]                 | 0.77           |
| Near Activities       | 83 [58, 96]           | 65 [38, 88]      | 83 [58, 96]      | 88 [67, 100]                 | 0.02           |
| Distance Activities   | 92 [83, 100]          | 83 [69, 92]      | 96 [78, 100]     | 96 [75, 100]                 | 0.05           |
| Vision Specific:      |                       |                  |                  |                              |                |
| Social Functioning    | 100 [100, 100]        | 100 [92, 100]    | 100 [92, 100]    | 100 [100, 100]               | 0.65           |
| Mental Health         | 80 [50, 95]           | 61 [45, 81]      | 80 [53, 95]      | 90 [69, 94]                  | 0.04           |
| Role Difficulties     | 88 [69, 100]          | 78 [44, 95]      | 94 [63, 100]     | 94 [69, 100]                 | 0.15           |
| Dependency            | 100 [75, 100]         | 94 [50, 100]     | 100 [66, 100]    | 100 [81, 100]                | 0.63           |
| Driving               | 79 [75, 100]          | 67 [50, 92]      | 96 [83, 100]     | 83 [67, 100]                 | 0.03           |
| Color Vision          | 100 [100, 100]        | 100 [100, 100]   | 100 [100, 100]   | 100 [100, 100]               | 0.75           |
| Peripheral Vision     | 100 [50, 100]         | 100 [75, 100]    | 100 [75, 100]    | 100 [100, 100]               | 0.09           |
| Composite Score       | 82 [68, 91]           | 76 [64, 85]      | 86 [70, 92]      | 87 [79, 92]                  | 0.04           |
